# Supplementary material for: Electronic nudge tool technology used in the critical care and peri-anaesthetic setting: a scoping review protocol
Source: HighWire-hosted journal article supplement (doi:10.1136/bmjopen-2021-057026), 2022-07-01
Supplement: bmjopen-2021-057026supp001_data_supplement.pdf [file bmjopen-2021-057026supp001_data_supplement.pdf]

**Supplement 1: Search strategy**

|              |                                                                                                                                                                                                                                                                                                                                                                                                                                                                                                                                                                                                                                                                                                                                                                                                                                           |
|--------------|-------------------------------------------------------------------------------------------------------------------------------------------------------------------------------------------------------------------------------------------------------------------------------------------------------------------------------------------------------------------------------------------------------------------------------------------------------------------------------------------------------------------------------------------------------------------------------------------------------------------------------------------------------------------------------------------------------------------------------------------------------------------------------------------------------------------------------------------|
| Database     | Ovid MEDLINE                                                                                                                                                                                                                                                                                                                                                                                                                                                                                                                                                                                                                                                                                                                                                                                                                              |
| Search terms | <p>“clinical decision support” OR “ decision support systems, clinical” OR<br/> “computer assisted diagnosis” OR “diagnosis, computer assisted” OR<br/> “computer assisted decision making” OR “decision making, computer-<br/> assisted” OR “decision support techniques” OR Artificial Intelligence” OR<br/> “cognitive aid” OR “CDSS” OR “Choice behaviour” OR “ choice architecture”<br/> OR “health behaviour” OR “Nudge”<br/> AND<br/> “critical care” OR “Intensive care unit” OR “ICU” OR “Intensive care units,<br/> Pediatric” OR “PICU” “Critical Care” OR “Intensive care units, Neonatal” OR<br/> “NICU” OR “peri-anaesthesia” OR “peri-operative” OR “anaesthesia”<br/> AND<br/> “Implementation Science” OR “Implementation” OR “Development” OR<br/> “Validation”<br/> AND limit to “English language” AND limit to “</p> |
| Limits       | Publication year 2007 – 2022<br>English language                                                                                                                                                                                                                                                                                                                                                                                                                                                                                                                                                                                                                                                                                                                                                                                          |
