# Supplementary material for: Electronic nudge tool technology used in the critical care and peri-anaesthetic setting: a scoping review protocol
Source: HighWire-hosted journal article supplement (doi:10.1136/bmjopen-2021-057026), 2022-07-01
Supplement: bmjopen-2021-057026supp002_data_supplement.pdf [file bmjopen-2021-057026supp002_data_supplement.pdf]

## **Supplement 2: Data extraction form**

Data Extraction Form- ATTITUDE Study Scoping Review

Identifying nudge tool technology currently used in critical care and explore associated implementation strategies.

|           |              |                    |                 |
|-----------|--------------|--------------------|-----------------|
| Study ID: | Lead author: | Reviewer initials: | Date of review: |
|-----------|--------------|--------------------|-----------------|

GENERAL STUDY INFORMATION AND ELIGIBILITY

|                |         |                                      |                              |
|----------------|---------|--------------------------------------|------------------------------|
| Title          | Authors | Journal / Trial registry             | Year / volume / page numbers |
| Type of Study: |         | Single / Multi centre<br><br>Number: | Length of study              |

| Participants                                   | Setting                                | Interventions                                                  | Format of Tool                    |
|------------------------------------------------|----------------------------------------|----------------------------------------------------------------|-----------------------------------|
| Adults, 18 years or older<br><br>Yes / No      | Critical Care<br>Yes / No              | Tool that raises automated alerts<br>Yes / No                  | Automated/ Electronic<br>Yes / No |
| Paediatric, preterm – 18 years<br><br>Yes / No | Anaesthesia/ Perioperative<br>Yes / No | Tool that recommends order set or treatment regime<br>Yes / No | Paper/ handwritten<br>Yes / No    |
| Both      Yes / No                             |                                        |                                                                |                                   |

Exclusion reason:

| PARTICIPANTS                               |                                 |
|--------------------------------------------|---------------------------------|
| Participants (months/years)                | N =                             |
| Age                                        | Mean:<br>SD:<br>Median:<br>IQR: |
| Inclusion criteria:<br>(SPECIFIC TO TRIAL) |                                 |
| Exclusion criteria:<br>(SPECIFIC TO TRIAL) |                                 |

| SETTING DETAILS |                                                                                                                                                                                                                                                             |                                                                                             |
|-----------------|-------------------------------------------------------------------------------------------------------------------------------------------------------------------------------------------------------------------------------------------------------------|---------------------------------------------------------------------------------------------|
| Country         | Type of acute setting                                                                                                                                                                                                                                       | Type of hospital                                                                            |
|                 | Intensive care unit <input type="checkbox"/><br>High dependency unit <input type="checkbox"/><br>Anaesthesia/ perioperative unit <input type="checkbox"/><br>Acute hospital ward <input type="checkbox"/><br>Other, please specify <input type="checkbox"/> | University affiliated <input type="checkbox"/><br>General hospital <input type="checkbox"/> |

|                          |
|--------------------------|
| <b>Additional notes:</b> |
|--------------------------|

| TOPIC 1: e-Nudge Tool Details                                                                                                                                                             |                                                        |
|-------------------------------------------------------------------------------------------------------------------------------------------------------------------------------------------|--------------------------------------------------------|
| Disease State <input type="checkbox"/><br><i>Specify details</i>                                                                                                                          | Hospital Organisation Setting <input type="checkbox"/> |
| Alert method                                                                                                                                                                              |                                                        |
| Alert recipient(s)                                                                                                                                                                        |                                                        |
| Frequency of alerts & alert limits                                                                                                                                                        |                                                        |
| Who is responsible for acting on alert(s)?                                                                                                                                                |                                                        |
| Action required for alert(s) acknowledgement                                                                                                                                              |                                                        |
| How does the tool initiate? Automatic initiation <input type="checkbox"/> or manual initiation <input type="checkbox"/>                                                                   |                                                        |
| Integration of e-nudge tool <i>(give details)</i><br><br>Stand alone with data streamed <input type="checkbox"/><br><br>Integrated into electronic health record <input type="checkbox"/> |                                                        |

|                                                                                    |                          |
|------------------------------------------------------------------------------------|--------------------------|
| TOPIC 2: e-Nudge Tool Implementation & Design                                      |                          |
| Who designed the concept & tool? (give details)                                    |                          |
| Inhouse/homegrown                                                                  | <input type="checkbox"/> |
| Author inclusion                                                                   | <input type="checkbox"/> |
| Independent developer                                                              | <input type="checkbox"/> |
| Pilot of e- Nudge device (give details)                                            |                          |
| Clinical team inclusion                                                            | <input type="checkbox"/> |
| Interface testing by intended team                                                 | <input type="checkbox"/> |
| Training resources provided<br>Manual, posters,e-learning etc.                     |                          |
| Planning process for device implementation (give details)<br>Super-users/Champions |                          |
| Training process for device implementation (give details)                          |                          |
| Trouble shooting & sustained support provision (give details)                      |                          |

|                                              |                |                                                                                          |
|----------------------------------------------|----------------|------------------------------------------------------------------------------------------|
|                                              |                |                                                                                          |
| Analysis of user interaction/ response rates | (give details) | Fed back during implementation? Yes <input type="checkbox"/> No <input type="checkbox"/> |
|                                              |                |                                                                                          |

|                                                                       |                          |
|-----------------------------------------------------------------------|--------------------------|
| TOPIC 3: e-Nudge Tool Documented Impact                               |                          |
| Impact on participant(s)- How was impact assessed/ measured?          |                          |
| Patients                                                              | <input type="checkbox"/> |
| Staff                                                                 | <input type="checkbox"/> |
|                                                                       |                          |
| Outcome measures (if any)                                             |                          |
|                                                                       |                          |
| Analysis of user interaction and associated treatment recommendations |                          |
|                                                                       |                          |

| TOPIC 4: e-Nudge Tool Implementation Acceptability |                          |
|----------------------------------------------------|--------------------------|
| Evaluation of end user experience                  |                          |
| Patient                                            | <input type="checkbox"/> |
| Staff                                              | <input type="checkbox"/> |

**Additional notes:**
